# Supplementary material for: Chemoprevention of Head and Neck Cancer by Simultaneous Blocking of Epidermal Growth Factor Receptor and Cyclooxygenase-2 Signaling Pathways: Preclinical and Clinical Studies
Source: Oxford University Press journal article supplement (doi:10.1158/1078-0432.ccr-12-3149), 2013-02-19
Supplement: 10780432ccr123149-sup-103076_1_supp_1778179_mll18f.doc [file 10780432ccr123149-sup-103076_1_supp_1778179_mll18f.doc]

Table S1 Summary of the top 27 genes/proteins associated with clinical response

| Protein names | Spearman’s correlation coefficient | p-value |
| --- | --- | --- |
| Histone_H2A_X_Phospho_Ser139_ | -0.402597068 | 0.3705 |
| SAPK_JNK_Phospho_Thr183_ | -0.402597068 | 0.3705 |
| Src_Phospho_Tyr418_ | 0.402597068 | 0.3705 |
| Akt_Phospho_Thr308_ | 0.40778621 | 0.3638 |
| Myc_Phospho_Thr58_ | 0.424830888 | 0.3421 |
| JAK2_Phospho_Tyr1007_ | -0.430376683 | 0.3351 |
| HSP27_Phospho_Ser15_ | -0.434271574 | 0.3303 |
| p53_Phospho_Ser6_ | 0.443889075 | 0.3184 |
| mTOR_Phospho_Ser2448_ | 0.449088713 | 0.3121 |
| Akt2_Phospho_Ser474_ | 0.464535078 | 0.2936 |
| cdc25C_Phospho_Ser216_ | -0.466041382 | 0.2919 |
| Met_Phospho_Tyr1349_ | 0.467800743 | 0.2898 |
| FGF_Receptor_1_Phospho_Tyr154_ | -0.505224802 | 0.2474 |
| Keratin_18_Phospho_Ser33_ | 0.505224802 | 0.2474 |
| Src_Phospho_Tyr529_ | 0.505224802 | 0.2474 |
| p27Kip1_Phospho_Thr187_ | 0.53474079 | 0.2162 |
| CrkII_Phospho_Tyr221_ | 0.567765096 | 0.1837 |
| HER2_Phospho_Tyr877_ | 0.567765096 | 0.1837 |
| TYK2_Phospho_Tyr1054_ | 0.606788036 | 0.1485 |
| _E_BP1_Phospho_Thr36_ | 0.640806901 | 0.1210 |
| P38_MAPK_Phospho_Thr180_ | 0.640806901 | 0.1210 |
| MEK1_Phospho_Ser217_ | -0.67363307 | 0.0971 |
| BRCA1_Phospho_Ser1524_ | -0.689170107 | 0.0868 |
| JunB_Phospho_Ser259_ | 0.689170107 | 0.0868 |
| I_kappa_B_alpha_Phospho_Ser32_Ph | 0.698610794 | 0.0808 |
| MEK1_Phospho_Thr291_ | 0.711057129 | 0.0732 |
| eEF2K_Phospho_Ser366_ | -0.767193218 | 0.0441 |

Note: Those with p < 0.1 are highlighted in yellow.
